# Supplementary material for: Macronutrient Composition of the Australian Population’s Diet; Trends from Three National Nutrition Surveys 1983, 1995 and 2012
Source: PubMed Central journal article supplement (PMC6115811; doi:10.3390/nu10081045), 2018-08-08
Supplement: nutrients-10-01045-s001.pdf [file nutrients-10-01045-s001.pdf]

**Supplementary Table S1.** Change in percentage energy from macronutrients from Australian National Nutrition Surveys 1983 (n = 5062), 1995 (n = 6284) and 2012 (n = 4380) excluding low energy-reporters

| Macronutrient        | Survey         | Men    |             | Women  |             | Total Population |             |
|----------------------|----------------|--------|-------------|--------|-------------|------------------|-------------|
|                      |                | Mean   | (±95% CI)   | Mean   | (±95% CI)   | Mean             | (±95% CI)   |
| <b>Protein</b>       | 1983           | 17.1   | (16.9–17.3) | 17.3   | (17.1–17.5) | 17.2             | (17.1–17.3) |
|                      | 1995           | 16.6   | (16.4–16.8) | 16.6   | (16.4–16.7) | 16.6             | (16.5–16.7) |
|                      | 2012           | 17.7   | (17.5–18.0) | 17.9   | (17.7–18.1) | 17.8             | (17.7–18.0) |
|                      | <i>P-Value</i> | 0.0012 |             | 0.0006 |             | <.0001           |             |
| <b>Carbohydrate</b>  | 1983           | 39.0   | (38.7–39.4) | 40.6   | (40.3–41.0) | 39.8             | (39.6–40.1) |
|                      | 1995           | 44.0   | (43.7–44.3) | 45.0   | (44.7–45.4) | 44.5             | (44.2–44.7) |
|                      | 2012           | 42.6   | (42.2–43.1) | 42.3   | (41.9–42.8) | 42.5             | (42.2–42.8) |
|                      | <i>P-Value</i> | <.0001 |             | <.0001 |             | <.0001           |             |
| <b>Fat</b>           | 1983           | 35.7   | (35.4–36.0) | 36.0   | (35.7–36.3) | 35.9             | (35.6–36.1) |
|                      | 1995           | 32.1   | (31.8–32.4) | 32.8   | (32.5–33.1) | 32.4             | (32.2–32.6) |
|                      | 2012           | 30.9   | (30.5–31.3) | 32.2   | (31.8–32.6) | 31.5             | (31.3–31.8) |
|                      | <i>P-Value</i> | <.0001 |             | <.0001 |             | <.0001           |             |
| <b>Alcohol ‡</b>     | 1983           | 6.2    | (5.8–6.5)   | 3.7    | (3.4–3.9)   | 4.9              | (4.7–5.1)   |
|                      | 1995           | 4.8    | (4.5–5.1)   | 2.9    | (2.6–3.1)   | 3.9              | (3.7–4.1)   |
|                      | 2012           | 5.7    | (5.3–6.2)   | 4.2    | (3.8–4.5)   | 5.0              | (4.7–5.3)   |
|                      | <i>P-Value</i> | 0.0004 |             | 0.0604 |             | 0.0006           |             |
| <b>Dietary Fibre</b> | 1983           | 1.8    | (1.8–1.9)   | 2.1    | (2.1–2.1)   | 2.0              | (1.9–2.0)   |
|                      | 1995           | 1.9    | (1.9–1.9)   | 2.1    | (2.1–2.1)   | 2.0              | (2.0–2.0)   |
|                      | 2012           | 2.0    | (1.9–2.0)   | 2.2    | (2.2–2.3)   | 2.1              | (2.1–2.1)   |
|                      | <i>P-Value</i> | 0.0003 |             | 0.0533 |             | 0.0002           |             |

Low energy-reporters are defined as those with energy intake: basal metabolic rate ratio between <0.87  
 %E; percentage energy  
 Survey weights applied  
 P-value; mean differences determined with ANOVA

**Supplementary Table S2:** Sensitivity analysis to assess the impact of sampling on percentage energy from macronutrients in the National Nutrition Survey, 1995 and the National Nutrition and Physical Activity Survey, 2011/12 to find a comparable sample to the National Dietary Survey of Adults, 1983^

| <b>Macronutrient</b> | <b>Sex</b>       | <b>Survey</b> | <b>Mean</b> | <b>95 % CI</b> | <b>P-Value</b> |
|----------------------|------------------|---------------|-------------|----------------|----------------|
| Protein              | Males            | 1983          | 17.4        | (17.2–17.5)    | <.0001         |
|                      |                  | 1995          | 16.9        | (16.6–17.2)    |                |
|                      |                  | 2012          | 18.4        | (18.1–18.7)    |                |
|                      | Females          | 1983          | 18.0        | (17.8–18.2)    |                |
|                      |                  | 1995          | 16.9        | (16.6–17.1)    |                |
|                      |                  | 2012          | 18.5        | (18.2–18.8)    |                |
|                      | Total Population | 1983          | 17.7        | (17.6–17.8)    |                |
|                      |                  | 1995          | 16.9        | (16.7–17.1)    |                |
|                      |                  | 2012          | 18.5        | (18.2–18.7)    |                |
| Carbohydrate         | Males            | 1983          | 39.1        | (38.8–39.5)    | <.0001         |
|                      |                  | 1995          | 44.1        | (43.5–44.7)    |                |
|                      |                  | 2012          | 43.5        | (42.9–44.0)    |                |
|                      | Females          | 1983          | 40.8        | (40.5–41.1)    |                |
|                      |                  | 1995          | 46.2        | (45.7–46.8)    |                |
|                      |                  | 2012          | 43.5        | (42.9–44.0)    |                |
|                      | Total Population | 1983          | 40.0        | (39.8–40.3)    |                |
|                      |                  | 1995          | 45.2        | (44.7–45.6)    |                |
|                      |                  | 2012          | 43.5        | (43.1–43.8)    |                |
| Fat                  | Males            | 1983          | 35.2        | (34.9–35.5)    | <.0001         |
|                      |                  | 1995          | 32.0        | (31.5–32.5)    |                |
|                      |                  | 2012          | 30.5        | (30.1–31.0)    |                |
|                      | Females          | 1983          | 35.3        | (35.0–35.6)    |                |
|                      |                  | 1995          | 31.8        | (31.2–32.3)    |                |
|                      |                  | 2012          | 31.2        | (30.8–31.6)    |                |
|                      | Total Population | 1983          | 35.3        | (35.0–35.5)    |                |
|                      |                  | 1995          | 31.9        | (31.5–32.2)    |                |
|                      |                  | 2012          | 30.9        | (30.6–31.2)    |                |
| Alcohol              | Males            | 1983          | 6.2         | (5.9–6.5)      | 0.0252         |
|                      |                  | 1995          | 4.7         | (4.2–5.2)      |                |
|                      |                  | 2012          | 4.7         | (4.3–5.2)      |                |
|                      | Females          | 1983          | 3.4         | (3.1–3.6)      |                |
|                      |                  | 1995          | 2.5         | (2.1–2.8)      |                |
|                      |                  | 2012          | 3.4         | (3.1–3.8)      |                |
|                      | Total Population | 1983          | 4.7         | (4.5–4.9)      |                |
|                      |                  | 1995          | 3.6         | (3.3–3.9)      |                |
|                      |                  | 2012          | 4.1         | (3.8–4.3)      |                |
| Fibre                | Males            | 1983          | 1.9         | (1.8–1.9)      | 0.001          |
|                      |                  | 1995          | 2.0         | (1.9–2.0)      |                |
|                      |                  | 2012          | 2.1         | (2.1–2.1)      |                |
|                      | Females          | 1983          | 2.2         | (2.2–2.2)      |                |
|                      |                  | 1995          | 2.3         | (2.2–2.3)      |                |
|                      |                  | 2012          | 2.4         | (2.4–2.4)      |                |

|                  |      |     |           |        |
|------------------|------|-----|-----------|--------|
| Total Population | 1983 | 2.1 | (2.0–2.1) | 0.0003 |
|                  | 1995 | 2.1 | (2.1–2.1) |        |
|                  | 2012 | 2.3 | (2.2–2.3) |        |

---

Survey weights applied

P-values; mean differences determined with ANOVA or t-tests

^ Estimates for each survey derived from participants aged 25–64 years, with reported intake on Sunday to Thursday, interview months May to November and from capital cities of Australia.
